# Supplementary material
Source: publisher site journal article supplement (https://www.dovepress.com/article/327641)
Supplement: Supplementary file 1 [file get_supplementary_file.php]

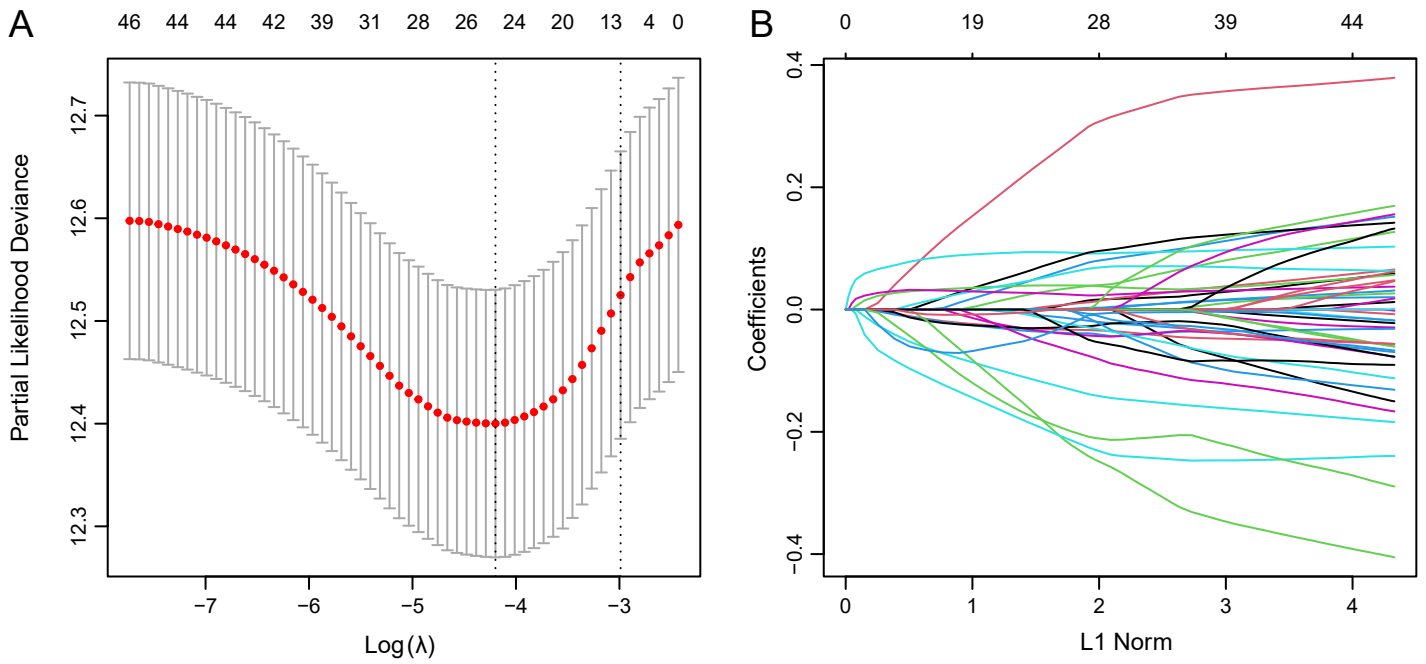

**Figure S1. Prognostic selection by the least absolute shrinkage and selection operator analysis**

A, The optimal tuning parameter (Lambda) in the least absolute shrinkage and selection operator (LASSO) analysis selected with the 5-fold cross-validation and one standard error rule; B, LASSO coefficient profiles of the 47 intersected genes.
